# Supplementary material for: Natural Ventilation and Air Purification for Effective Removal of Airborne Virus in Classrooms with Heater Operation
Source: MDPI journal article supplement (doi:10.3390/toxics10100573), 2022-09-30
Supplement: s1 [file s1]

Supplemental Materials

# Natural Ventilation and Air Purification for Effective Removal of Airborne Virus in Classrooms with Heater Operation

Su-Hoon Park<sup>1</sup>, Se-Jin Yook<sup>1,\*</sup>, Hyun Bon Koo<sup>2,\*</sup>

<sup>1</sup> School of Mechanical Engineering, Hanyang University, Seoul 04763, Korea

<sup>2</sup> Department of Structural Engineering Research, Korea Institute of Civil Engineering and Building Technology, Goyang-si 10223, Gyeonggi-do, Korea

\*Correspondence: [ysjnuri@hanyang.ac.kr](mailto:ysjnuri@hanyang.ac.kr) (S.-J.Y.), [mygoomy@kict.re.kr](mailto:mygoomy@kict.re.kr) (H.B.K.)

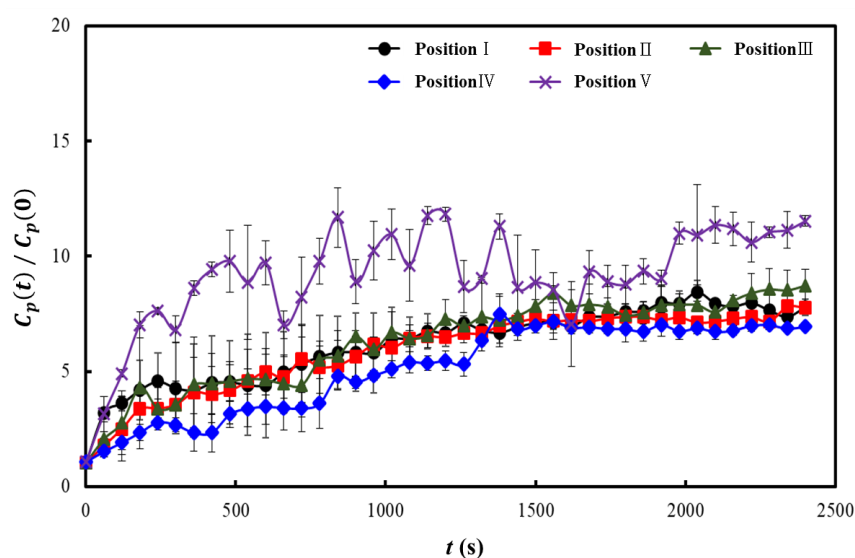

(a)

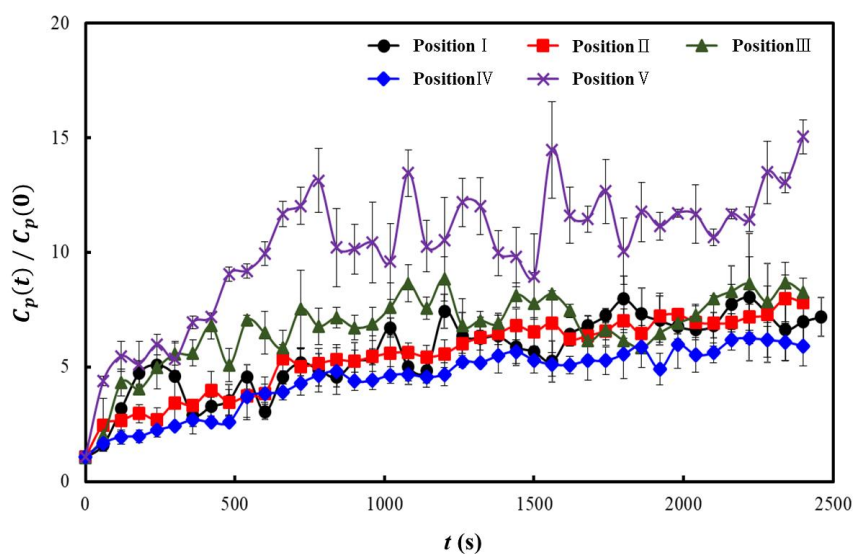

(b)

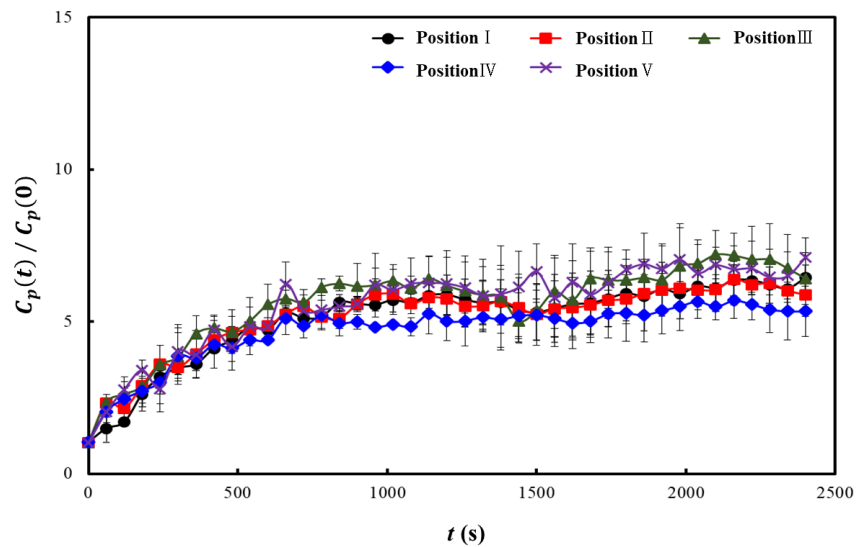

(c)

**Figure S1.** Comparison of the dimensionless particle number concentrations for different measurement positions when one air purifier was operated with all windows closed: (a) Case 3; (b) Case 4; (c) Case 5.

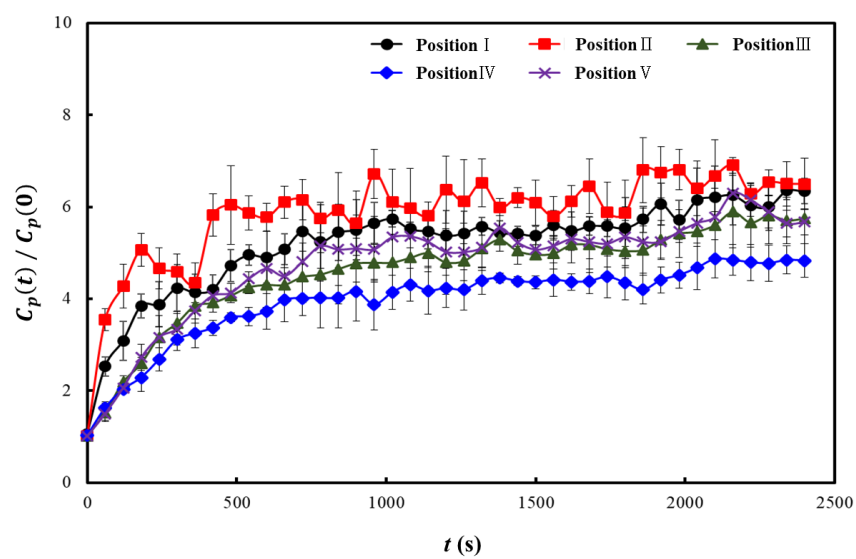

(a)

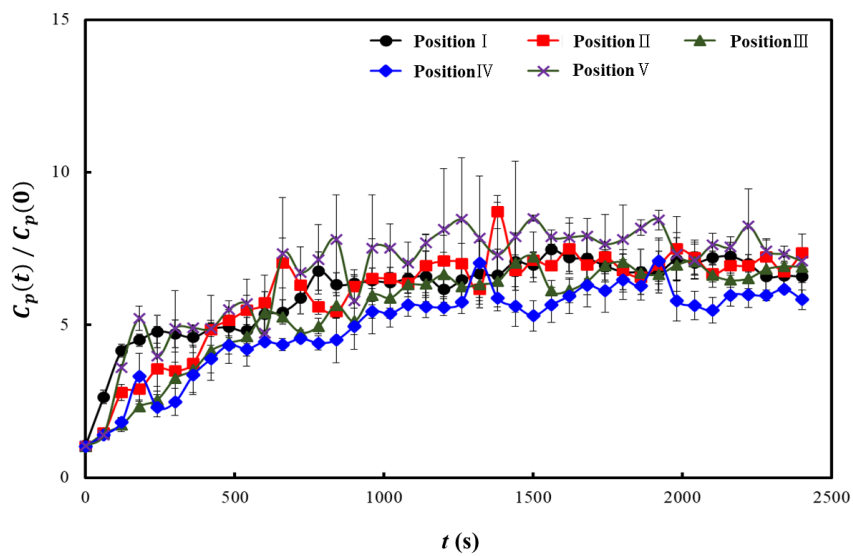

(b)

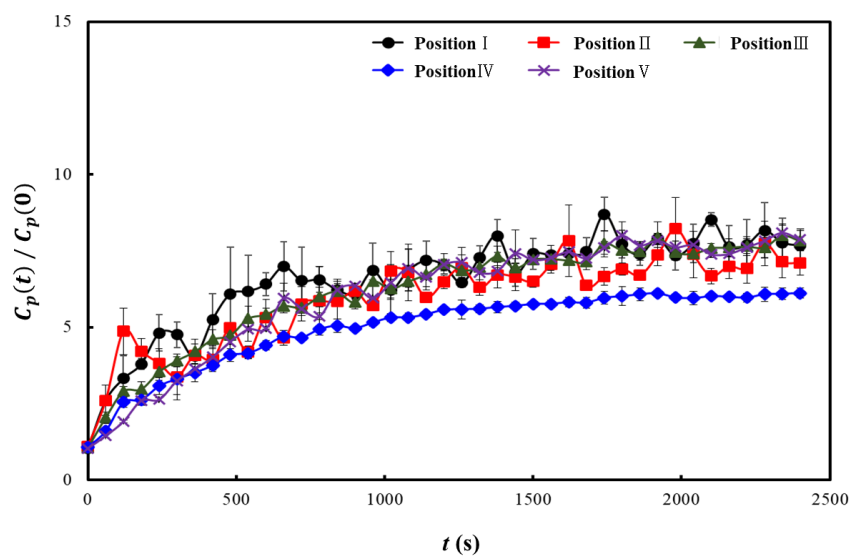

(c)

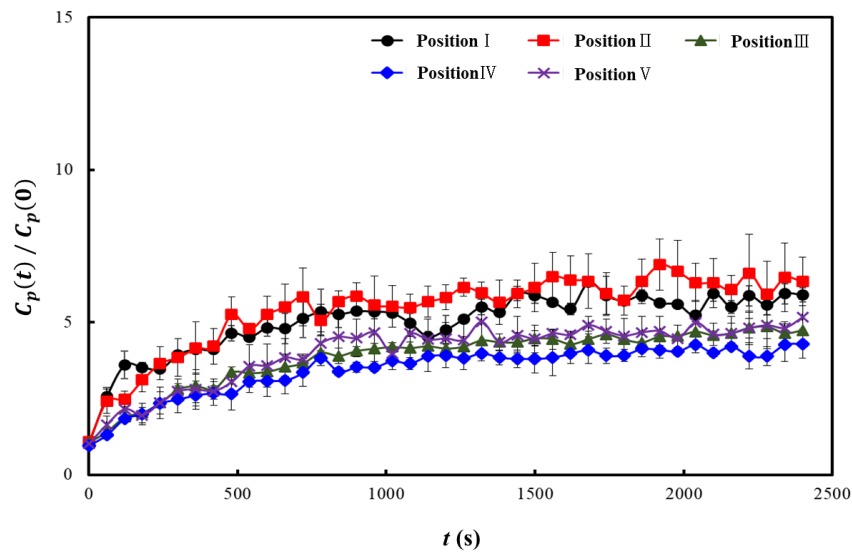

(d)

**Figure S2.** Comparison of the dimensionless particle number concentrations for different measurement positions when two air purifiers were operated with all windows closed: (a) Case 7; (b) Case 8; (c) Case 9; (d) Case 10.

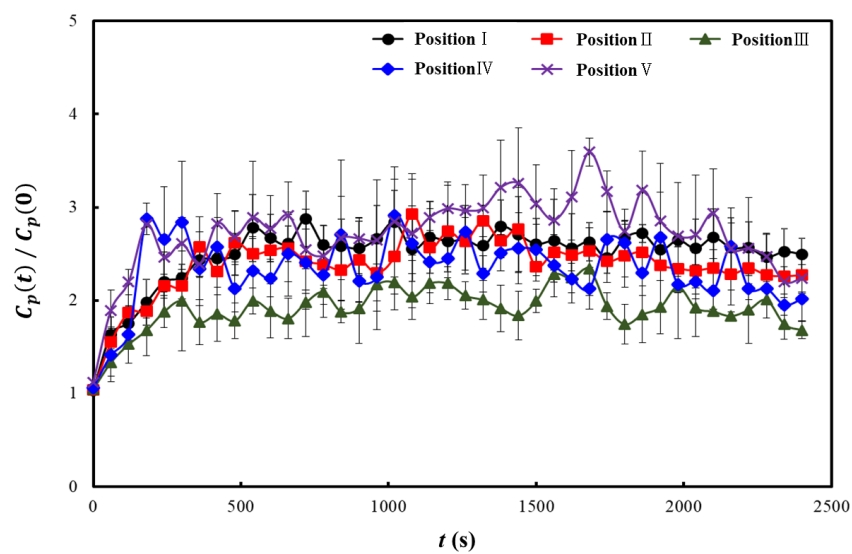

(a)

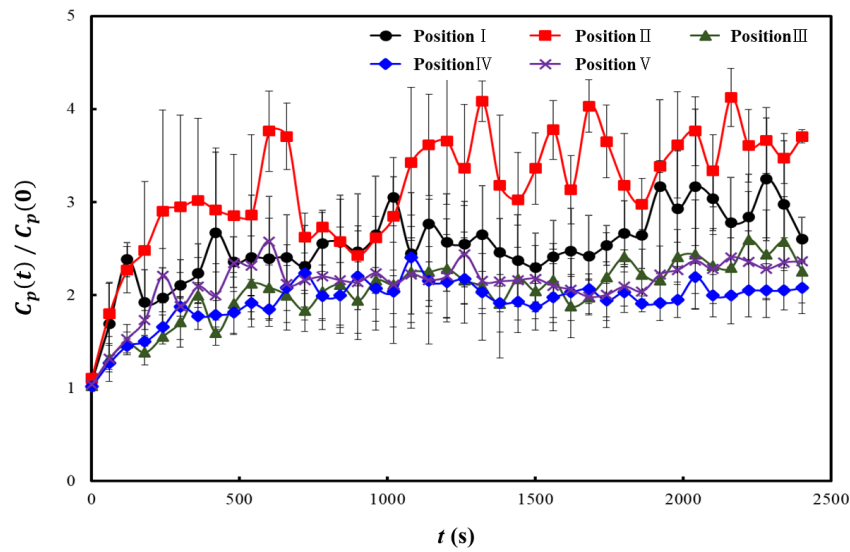

(b)

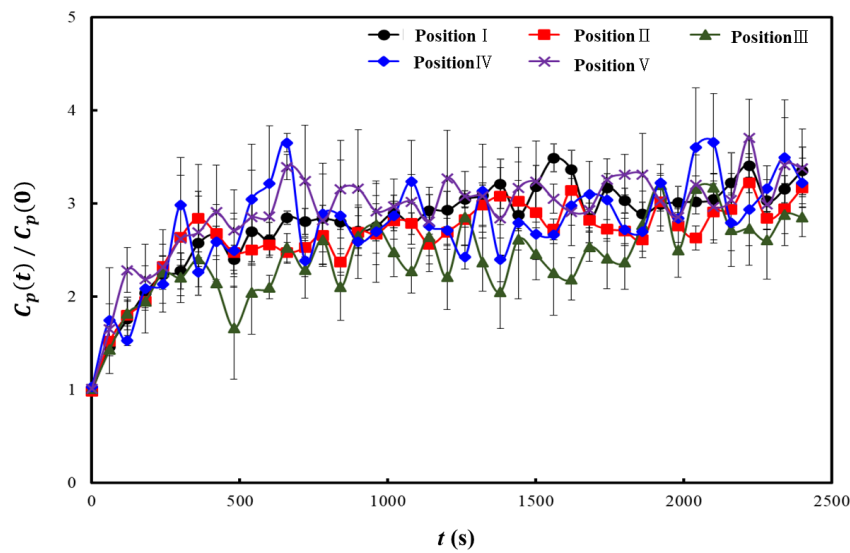

(c)

**Figure S3.** Comparison of the dimensionless particle number concentrations for different measurement positions when one air purifier was operated with all windows open: (a) Case 12; (b) Case 13; (c) Case 14.

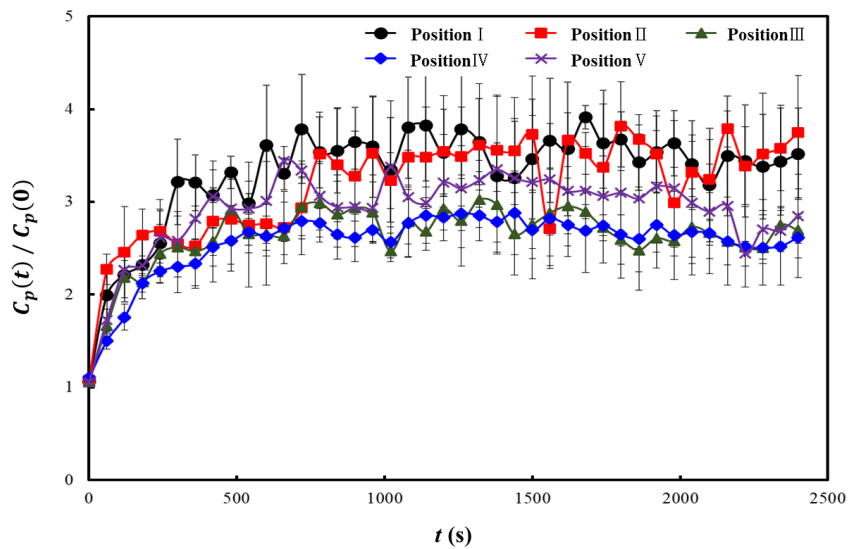

(a)

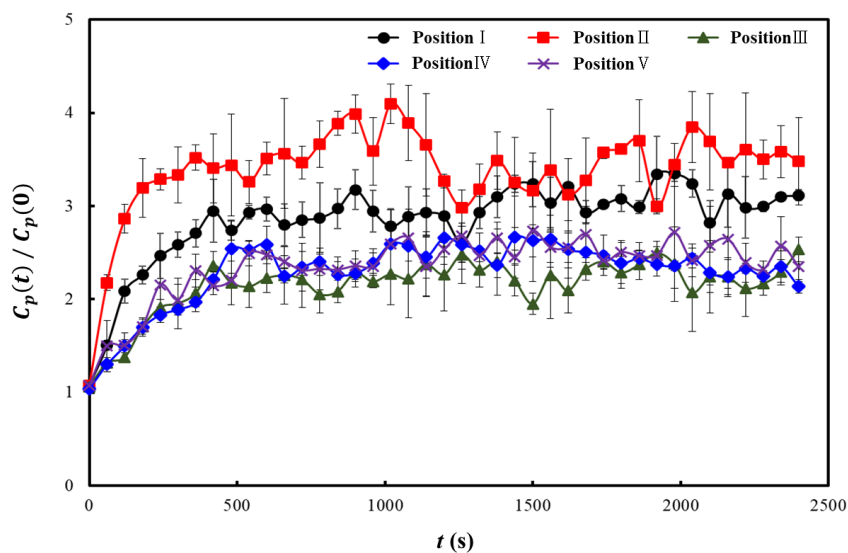

(b)

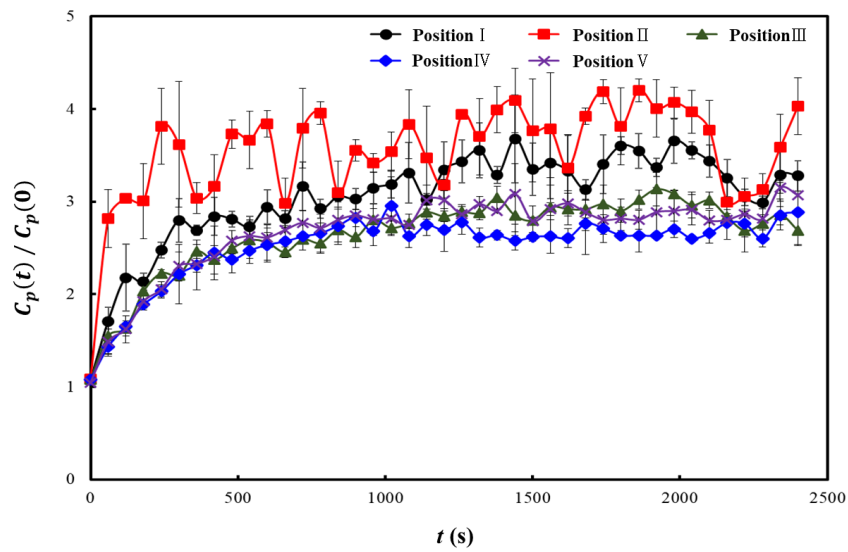

(c)

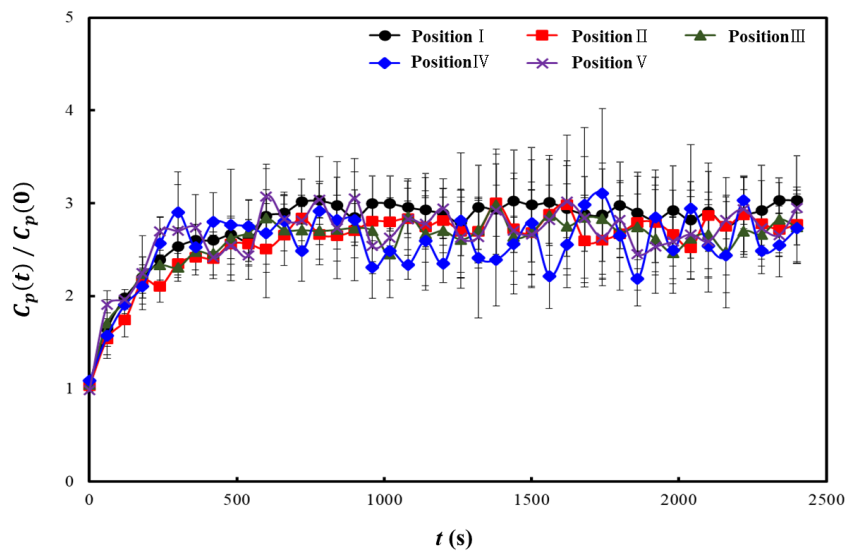

(d)

**Figure S4.** Comparison of the dimensionless particle number concentrations for different measurement positions when two air purifiers were operated with all windows open: (a) Case 16; (b) Case 17; (c) Case 18; (d) Case 19.
